# Supplementary material for: miR-203 and miR-320 Regulate Bone Morphogenetic Protein-2-Induced Osteoblast Differentiation by Targeting Distal-Less Homeobox 5 (Dlx5)
Source: PubMed Central journal article supplement (PMC5294999; doi:10.3390/genes8010004), 2016-12-23
Supplement: genes-08-00004-s001.pdf [file genes-08-00004-s001.pdf]

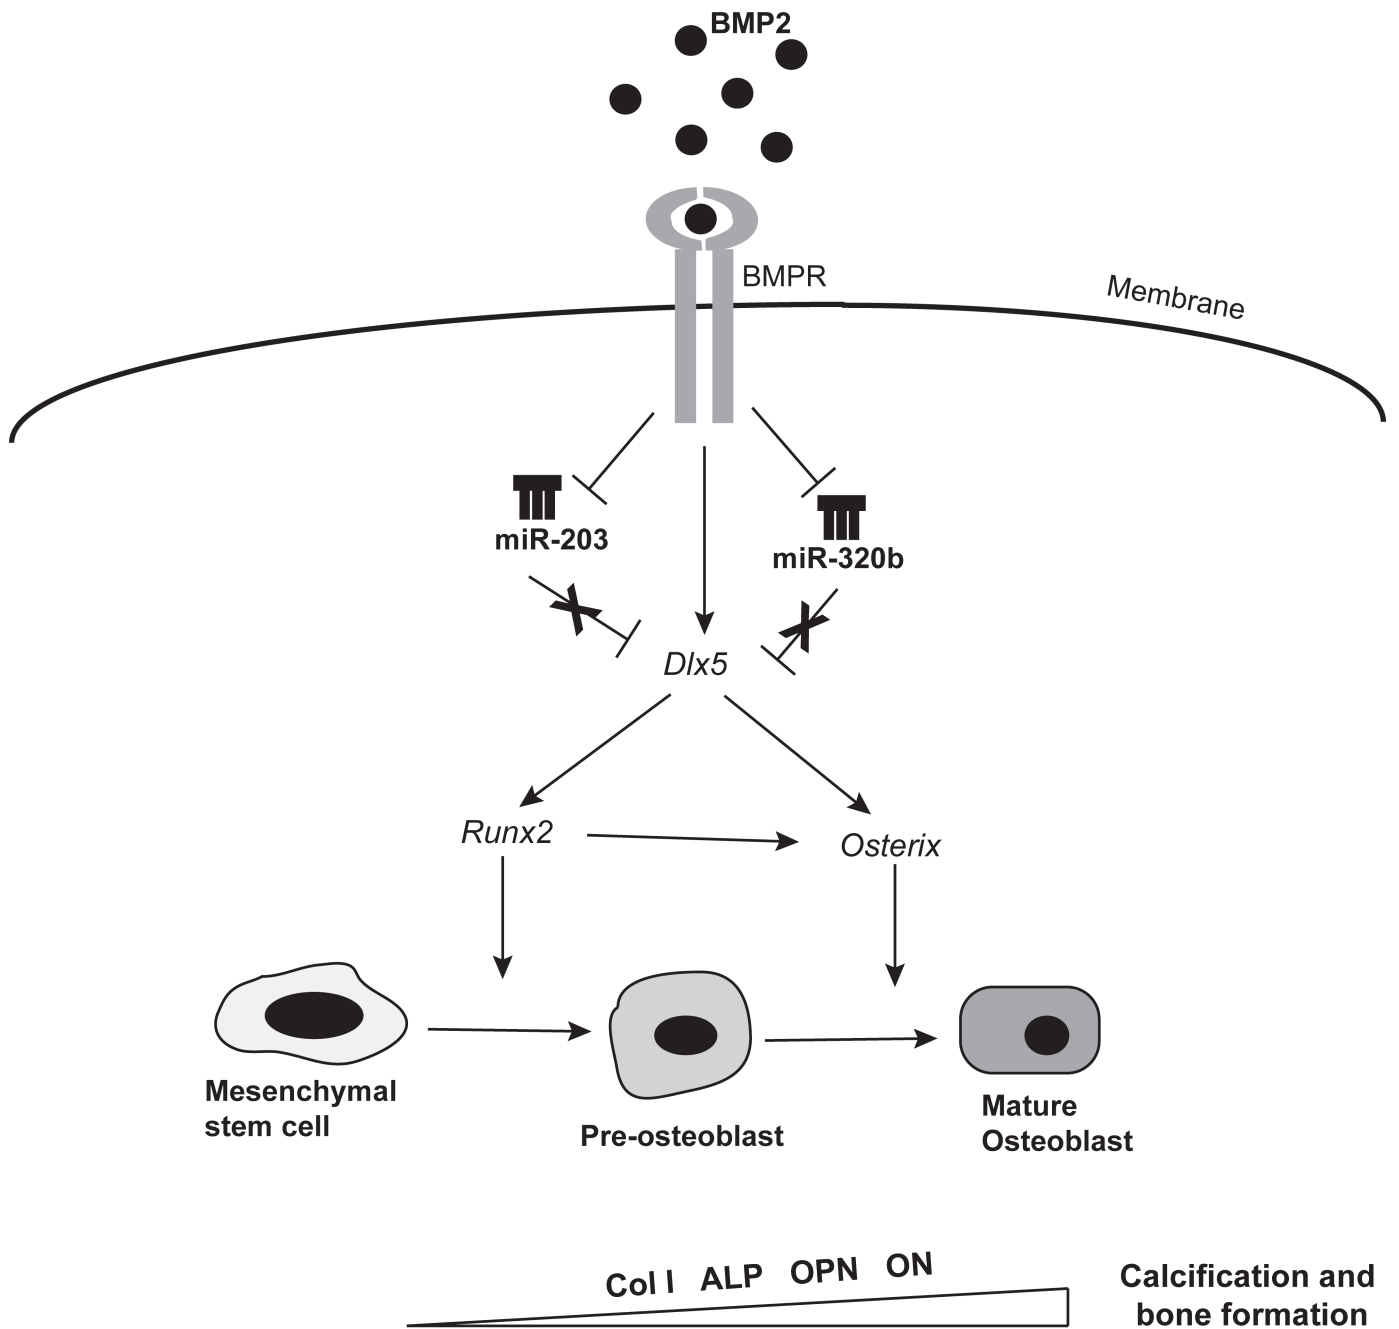

→ Promote osteoblast differentiation

⊥ Inhibit osteoblast differentiation

▮ MicroRNA
